# Supplementary material for: Metagenomic Nanopore Sequencing of Influenza Virus Direct from Clinical Respiratory Samples
Source: PubMed Central journal article supplement (PMC6935926; doi:10.1128/jcm.00963-19), 2019-12-23
Supplement: JCM.00963-19-s0001.pdf [file JCM.00963-19-s0001.pdf]

## Supplementary material

**Figure S1 Comparison of viral read detection in throat swab samples with and without a filtration step.** Five influenza A positive throat swab samples (A-E) and five negative samples (F-J) were spiked with Hazara virus as positive control at  $10^4$  genome copies/ml and sequenced with and without filtration via a  $0.4\mu\text{m}$  filter prior to RNA extraction. Reads mapping to influenza or Hazara are shown for each sample.

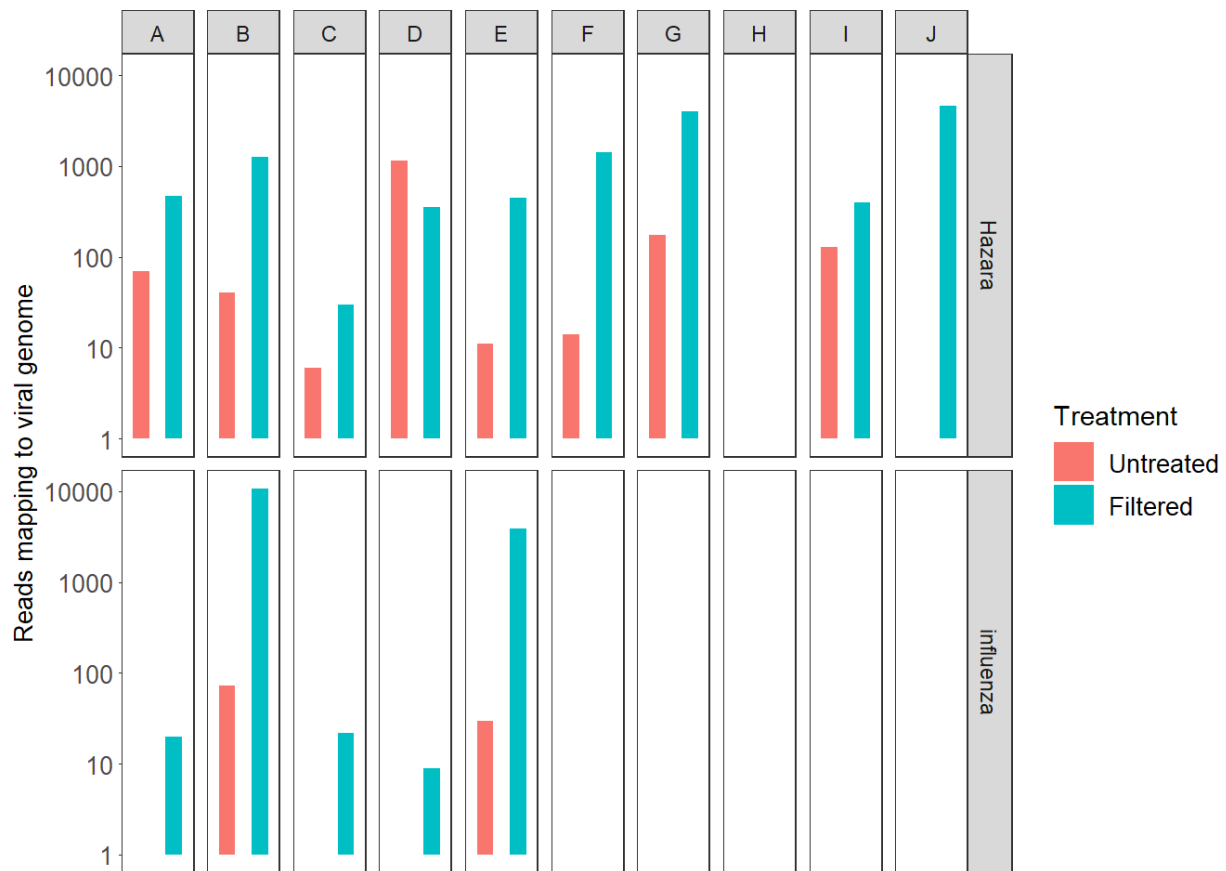

**Figure S2 Comparison of Filtration and Centrifugation as Pre-extraction treatments to improve viral detection.** Using a pool of 19 influenza A positive samples as input, triplicate extractions utilising either supernatant separation by centrifugation at 16,000 xg for 2 min, or filtration via a 0.4µm filter, were processed and all samples sequenced on a single flow cell. Mean total read numbers for each virus are plotted for each treatment, error bars indicate standard deviation.

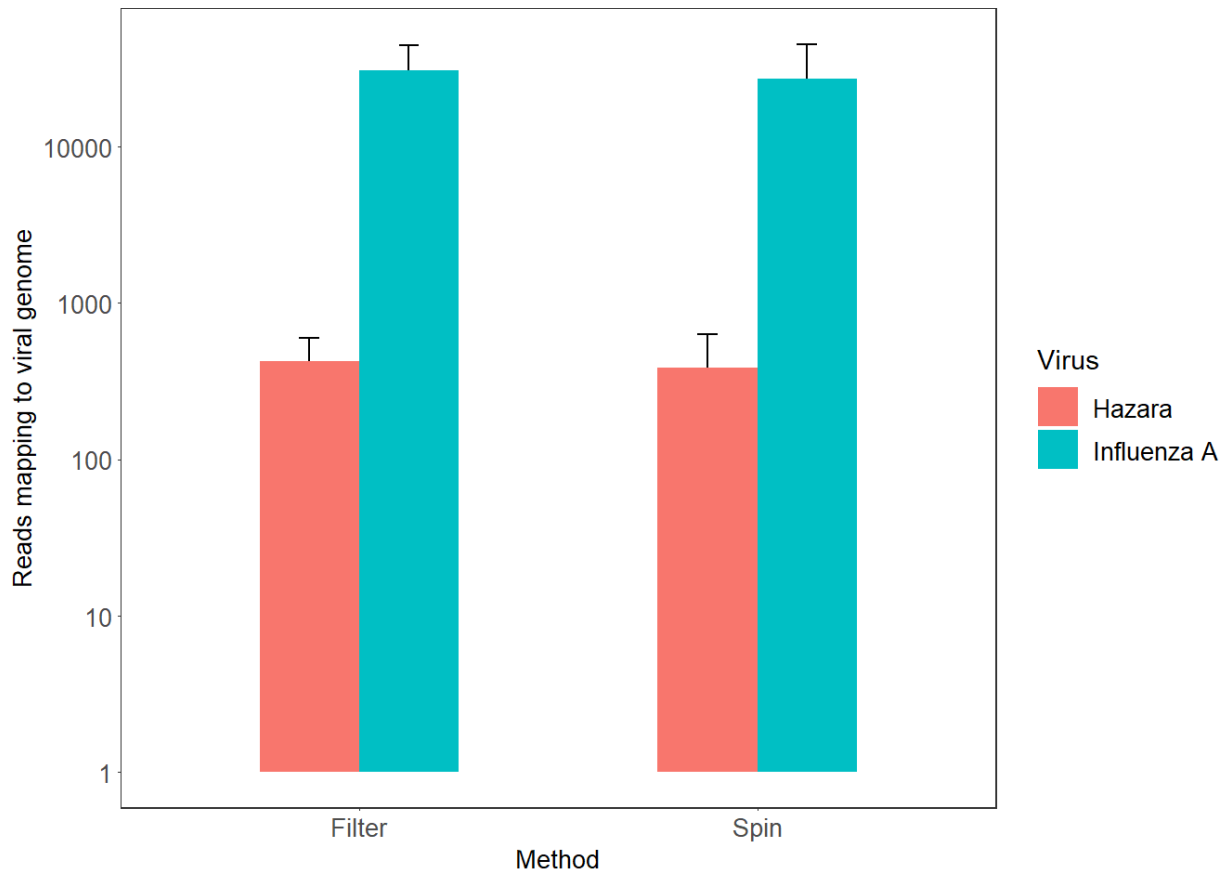

**Figure S3. Assessment of effect of original and reduced processing time method on metagenomic viral sequencing.** Using a pool of influenza A positive samples as input, triplicate extractions were processed by either existing (standard) or reduced incubation times (rapid) method and all samples sequenced on a single flow cell. Mean total read numbers for each virus are plotted for each treatment, error bars indicate standard deviation.

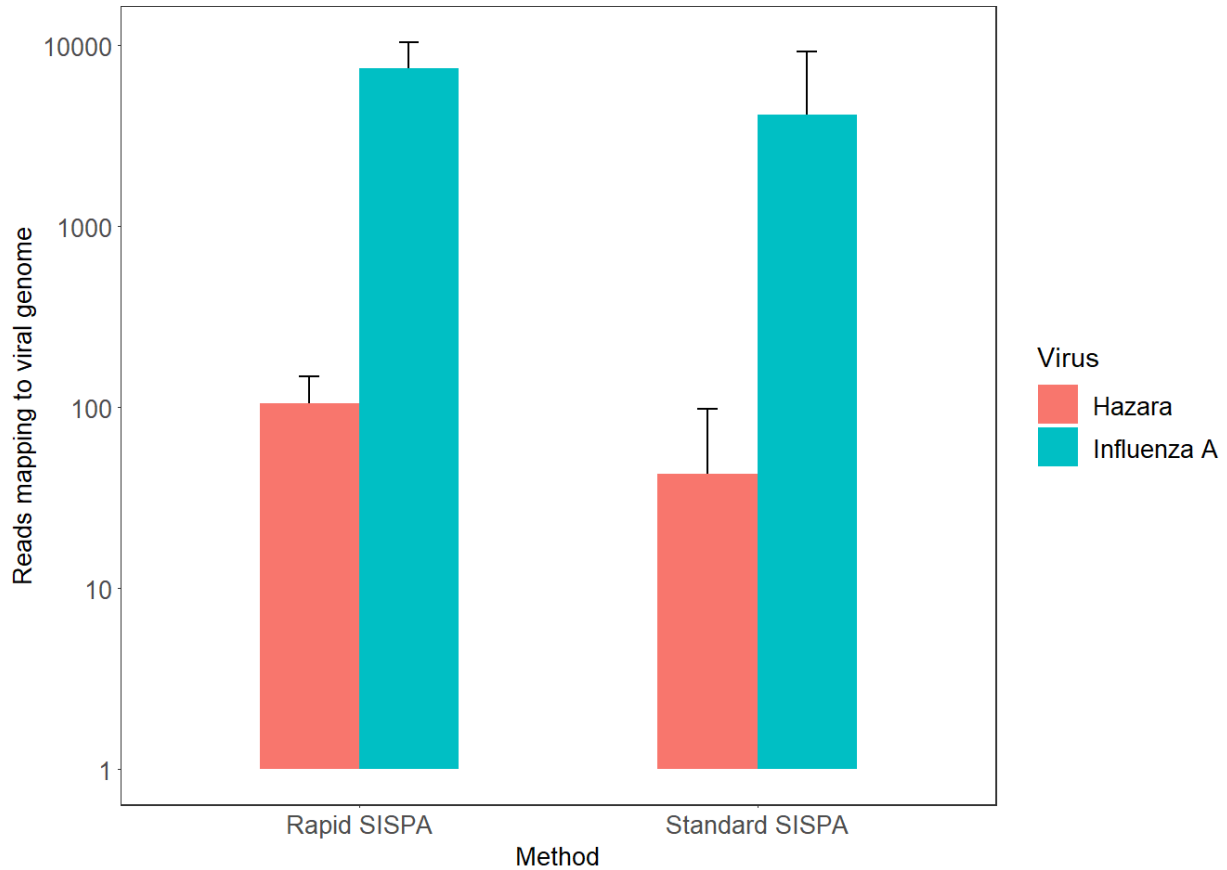

**Figure S4. Coverage of influenza sequences recovered by nanopore metagenomic sequencing.** Ct values were derived by testing using GeneXpert (Cepheid) in a clinical diagnostic laboratory. Genome coverage shown is the proportion of bases of the reference sequence that were called in the final consensus sequence for each sample.

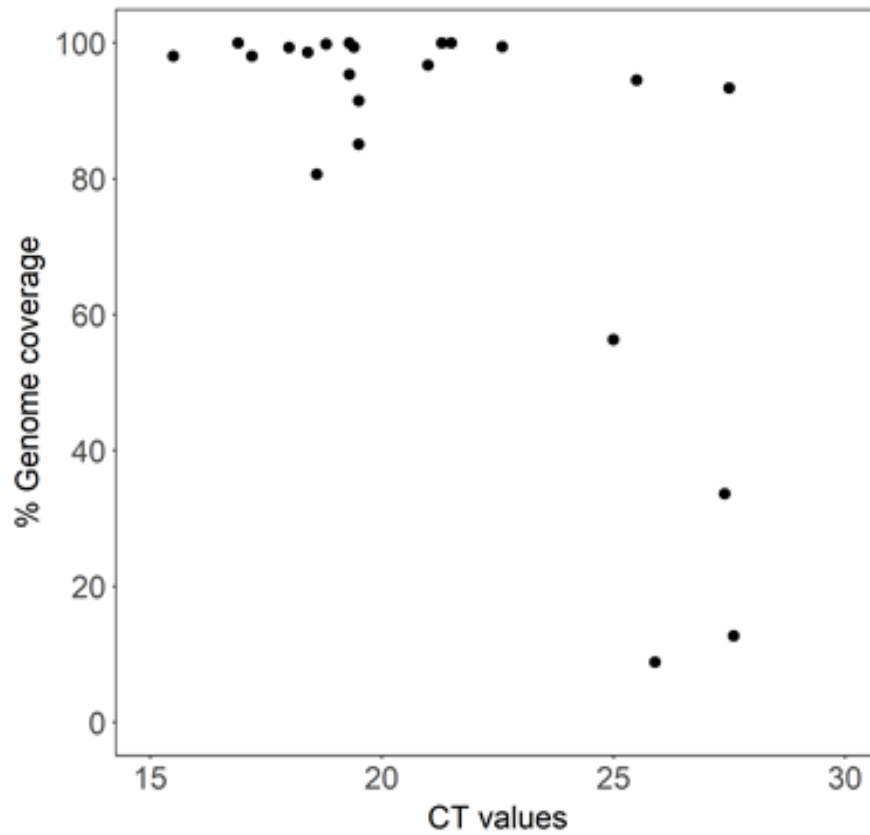

**Figure S5. Comparison of proportions of influenza reads derived by Nanopore or Illumina sequencing for a subset of the individual samples across a range of Ct values.** Ct values were derived by testing using GeneXpert (Cepheid) in a clinical diagnostic laboratory. Proportions are shown as number of influenza reads per million reads.

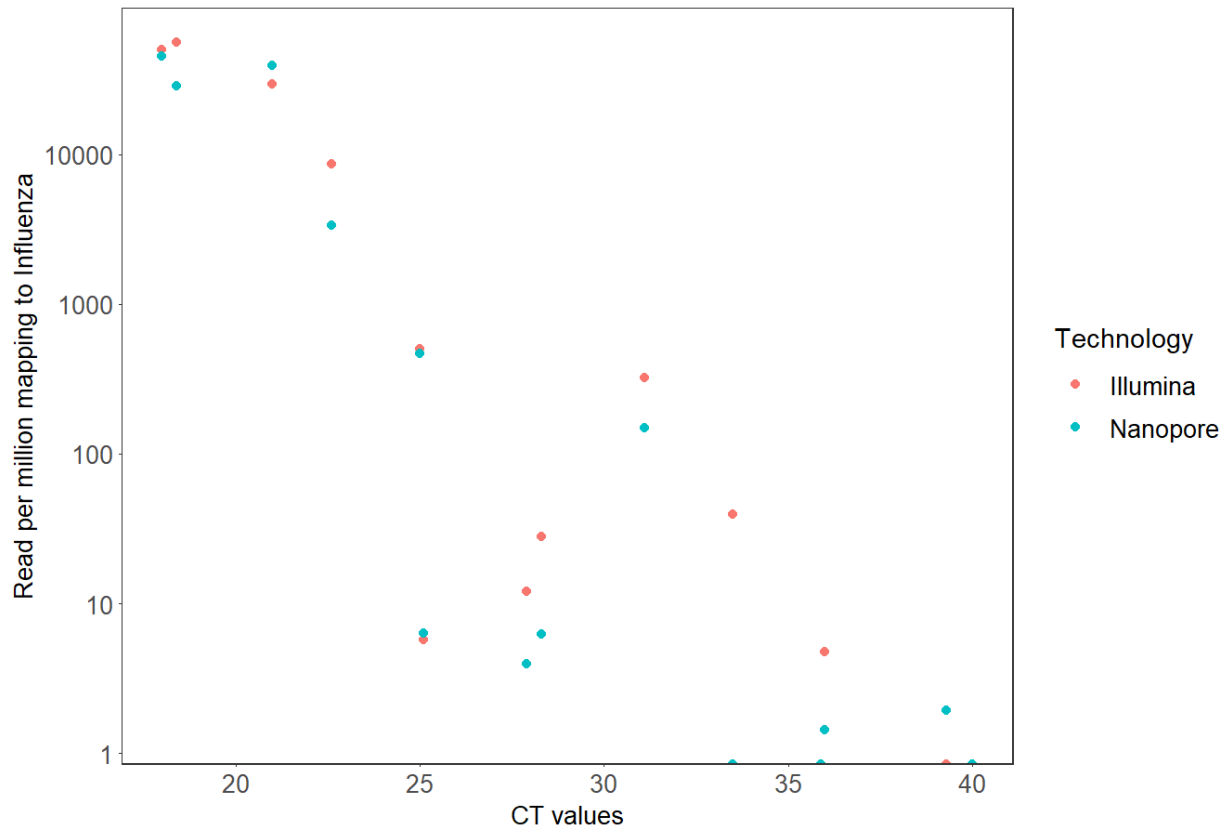

**Table S1. Summary data for the 50 individual throat swab samples.**

Table is available on Figshare DOI: 10.6084/m9.figshare.9772034

**Table S2 Comparison of influenza consensus sequences derived from Nanopore and Illumina sequencing.** This table lists the 4/15 human samples that gave near complete genome coverage, together with all 9 samples derived from the ferret study

| Study ID  | Cepheid Ct | ONT consensus coverage (%) | Illumina consensus coverage (%) | Nucleotide mismatch (identity %) |
|-----------|------------|----------------------------|---------------------------------|----------------------------------|
| Sample 5  | 18         | 99                         | 100                             | 0 (100)                          |
| Sample 6  | 18.4       | 99                         | 100                             | 0 (100)                          |
| Sample 14 | 21         | 97                         | 98                              | 7 (99.94)                        |
| Sample 17 | 22.6       | 99                         | 84                              | 0 (100)                          |
| A d2      | n/a        | 100                        | 100                             | 0 (100)                          |
| A d3      | n/a        | 100                        | 100                             | 0 (100)                          |
| A d5      | n/a        | 100                        | 100                             | 0 (100)                          |
| B d2      | n/a        | 100                        | 100                             | 0 (100)                          |
| B d3      | n/a        | 100                        | 100                             | 0 (100)                          |
| B d5      | n/a        | 98                         | 93                              | 0 (100)                          |
| C d2      | n/a        | 100                        | 100                             | 0 (100)                          |
| C d3      | n/a        | 100                        | 100                             | 0 (100)                          |
| C d5      | n/a        | 100                        | 100                             | 0 (100)                          |

Note: "Sample" indicates clinical human sample, A/B/C indicate samples from ferrets at indicated days post infection. n/a=not available

**Table S3. Comparison of influenza diagnostics approaches .**

|                                | <b>GeneXpert<br/>FluA/B<br/>RSV</b>                                            | <b>Biofire<br/>Respiratory<br/>Panel</b>                              | <b>Nanopore<br/>Metagenomic<br/>sequencing</b>                                                                                                         | <b>Nanopore<br/>targeted Flu<br/>sequencing</b>                            | <b>Illumina<br/>Metagenomic<br/>sequencing</b>                                            |
|--------------------------------|--------------------------------------------------------------------------------|-----------------------------------------------------------------------|--------------------------------------------------------------------------------------------------------------------------------------------------------|----------------------------------------------------------------------------|-------------------------------------------------------------------------------------------|
| <b>Reagent cost per test</b>   | +                                                                              | +++                                                                   | +++                                                                                                                                                    | ++                                                                         | ++                                                                                        |
| <b>Equipment/Start up cost</b> | +++                                                                            | +++                                                                   | +                                                                                                                                                      | +                                                                          | +++                                                                                       |
| <b>Wet lab time</b>            | +                                                                              | +                                                                     | +++                                                                                                                                                    | ++                                                                         | +++                                                                                       |
| <b>Sensitivity</b>             | +++                                                                            | +++                                                                   | +                                                                                                                                                      | ++                                                                         | +                                                                                         |
| <b>Target range</b>            | +                                                                              | ++                                                                    | +++                                                                                                                                                    | +                                                                          | +++                                                                                       |
|                                | Flu A/B, RSV                                                                   | 18 viruses<br>4 bacteria<br>(latest RP2)                              | All RNA viruses                                                                                                                                        | Flu A/B                                                                    | All RNA viruses                                                                           |
| <b>Advantages</b>              | Rapid and highly sensitive for influenza and RSV. No batching required.        | Rapid and highly sensitive for common pathogens. No batching required | Wide target range. Produces sequence data in real-time. Potential for near-patient testing. Small batch size. Accurate basecalling at consensus level. | Produces sequence data. Better sensitivity than pathogen agnostic methods. | Wide target range. Produces sequence data. Accuracy sufficient for minor variant analysis |
| <b>Disadvantages</b>           | Extremely limited target range. No info beyond presence / absence of 3 viruses | Expensive / limited range of targets. No sequence info generated.     | Requires expertise / slow / reduced sensitivity for influenza. Potential concerns about error rate in deep sequences.                                  | Limited target range.                                                      | Large start-up investment, large batch sizes required for cost effective running          |
